# Supplementary material
Source: publisher site journal article supplement (https://study.sagepub.com/sites/default/files/phillips_kelly_2e_appendix_2c.doc)
Supplement: Supplementary file 1 [file phillips_kelly_2e_appendix_2c.doc]

Appendix 2(c) Assessment of Visual Discrimination

**Name: Date of assessment:**

**Date of birth: Chronological age:**

**Instructions:**

Give a copy of this sheet to the learner. It then becomes a record sheet. Ask the learner to look at the letter or word on the left and circle the letter or word that matches in the line on the right.

**Practice item:**

Point to the letter in the margin and ask the learner to look carefully at all the letters on the right to find the one that matches. Do not do it for the learner so that this counts in the score.

| 1. | b | d | p | d | b h | g |
| --- | --- | --- | --- | --- | --- | --- |
| 2. | f | t | l | f | j k | d |
| 3. | u | n | v | m | wu | o |
| 4. | a | e | a | u | oi | c |
| 5. | on | no | on | in | an ou | oh |
| 6. | saw | sam | wan | was | saw | man |
| 7. | bus | sub | bus | sud | dus | ubs |
| 8. | girl | gril | lirg | irig | girl | girl |
| 9. | past | saps | pats | past | stap | taps |
| 10. | little | kitten | litter | kettle | skillet | little |

**Photocopiable**

*Assessment of Learners with Dyslexic-Type Difficulties* 2e © 2018 Sylvia Phillips and Kathleen Kelly (Sage: London).
